# Supplementary material
Source: publisher site journal article supplement (https://e-cmh.org/upload/media/cmh-2023-0087-Supplementary-Table-1.pdf)
Supplement: Supplementary file 1 [file cmh-2023-0087-Supplementary-Table-1.pdf]

**Supplementary Table 1.** Committee members of KASL Clinical Practice Guidelines for Management of AIH Development Committee

|        | Name            | Institution/Department                                  | Role/Part                                               |
|--------|-----------------|---------------------------------------------------------|---------------------------------------------------------|
| Chair  | Kyung-Ah Kim    | Inje University, Internal Medicine                      | Guiding the entire process                              |
| Deputy | Bo Hyun Kim     | National Cancer Center, Internal Medicine               | Organizing the entire process                           |
| Member | Kyeong Hee Kim  | Dong-A University, Laboratory Medicine                  | Diagnosis                                               |
|        | Ja Kyung Kim    | Yonsei University, Internal Medicine                    | Treatment                                               |
|        | Jeong Han Kim   | Konkuk University, Internal Medicine                    | Diagnosis                                               |
|        | Haeryoung Kim   | Seoul National University, Pathology                    | Diagnosis                                               |
|        | Won Sohn        | Sungkyunkwan University, Internal Medicine              | Treatment                                               |
|        | Dong Hyun Sinn  | Sungkyunkwan University, Internal Medicine              | Treatment                                               |
|        | Kyung Jae Lee   | Seoul National University, Pediatrics                   | Children                                                |
|        | Hyun Woong Lee  | Yonsei University, Internal Medicine                    | Clinical manifestations                                 |
|        | Sun Young Yim   | Korea University, Internal Medicine                     | Diagnosis and prognosis                                 |
|        | Young Chang     | Soonchunhyang University, Internal Medicine             | Treatment and systematic review                         |
|        | Eun Ju Cho      | Seoul National University, Internal Medicine            | Treatment                                               |
|        | Gwang Hyun Choi | Seoul National University, Internal Medicine            | Clinical manifestations                                 |
|        | Miyoung Choi    | National Evidence-based Healthcare Collaborating Agency | Methodology (advising the process of systematic review) |
|        | Nae-Yun Heo     | Inje University, Internal Medicine                      | Epidemiology, treatment, and systematic review          |

Delphi Committee

| Name            | Institution                                     |
|-----------------|-------------------------------------------------|
| Kang Mo Kim     | Ulsan University, Internal Medicine             |
| Moon Young Kim  | Yonsei University, Internal Medicine            |
| In Hee Kim      | Chonbuk National University, Internal Medicine  |
| Chang Wook Kim  | Catholic University, Internal Medicine          |
| Byung Seok Lee  | Chungnam National University, Internal Medicine |
| Jung Il Lee     | Yonsei University, Internal Medicine            |
| Hyung Joon Yim  | Korea University, Internal Medicine             |
| Jeong Won Jang  | Catholic University, Internal Medicine          |
| Dae Won Jun     | Han Yang University, Internal Medicine          |
| Woo Jin Chung   | Keimyung University, Internal Medicine          |
| Jae Youn Cheong | Ajou University, Internal Medicine              |

Advisory Committee

| Name             | Institution                                  |
|------------------|----------------------------------------------|
| Jae Sung Ko      | Seoul National University, Pediatrics        |
| So Young Kwon    | Konkuk University, Internal Medicine         |
| Young Seok Kim   | Soonchunhyang University, Internal Medicine  |
| Neung Hwa Park   | Ulsan University, Internal Medicine          |
| Joon Hyeok Lee   | Sungkyunkwan University, Internal Medicine   |
| Han Chu Lee      | Ulsan University, Internal Medicine          |
| Sook-Hyang Jeong | Seoul National University, Internal Medicine |
